# Supplementary material for: Multiple drug-loaded electrospun PLGA/gelatin composite nanofibers encapsulated with mesoporous ZnO nanospheres for potential postsurgical cancer treatment
Source: Royal Society of Chemistry journal article supplement (doi:10.1039/c4ra03722g), 2014-01-01
Supplement: c4ra03722g1.pdf [file c4ra03722g1.pdf]

## Supplementary Information

### **Multiple Drugs-loaded Electrospun PLGA/gelatin Composite Nanofibers Encapsulated with Mesoporous ZnO Nanospheres for Potential Postsurgical Cancer Treatment**

Junchao Wei<sup>1</sup>, Jun Hu<sup>1</sup>, Ming Li<sup>2</sup>, Yong Chen<sup>2</sup>, Yiwang Chen<sup>\*1</sup>

<sup>1</sup>Department of Chemistry/Institute of Polymers, Nanchang University, 999 Xuefu  
Avenue, Nanchang 330031, China; <sup>2</sup>Institute for Advanced Study, Nanchang  
University, 999 Xuefu Avenue, Nanchang 330031, China

---

\* Corresponding author. Tel.: +86 791 83969562; fax: +86 791 83969561. *E-mail address*: ywchen@ncu.edu.cn (Y. Chen).

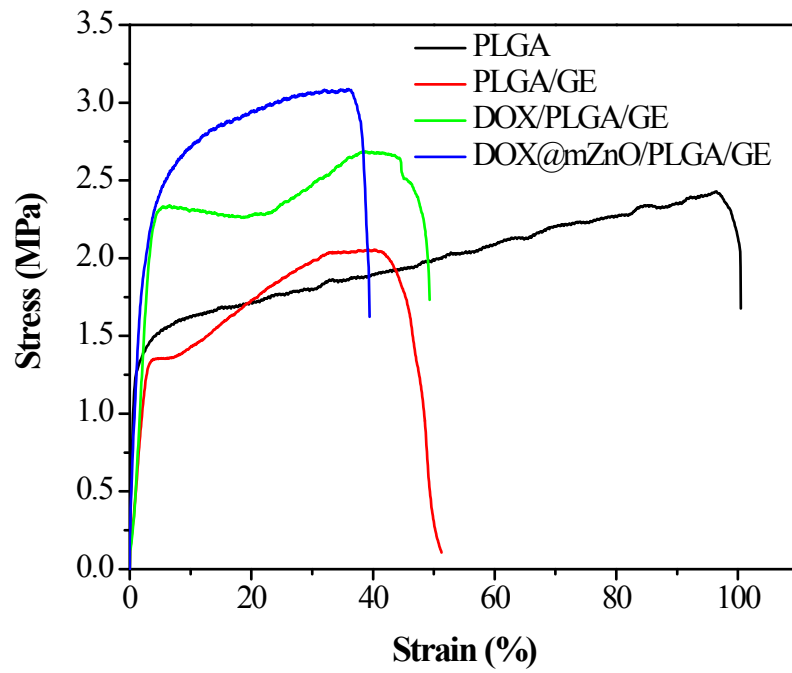

**Fig. S1** Typical tensile stress-strain curves of neat PLGA, PLGA/GE, DOX/PLGA/GE and DOX@mZnO/PLGA/GE.

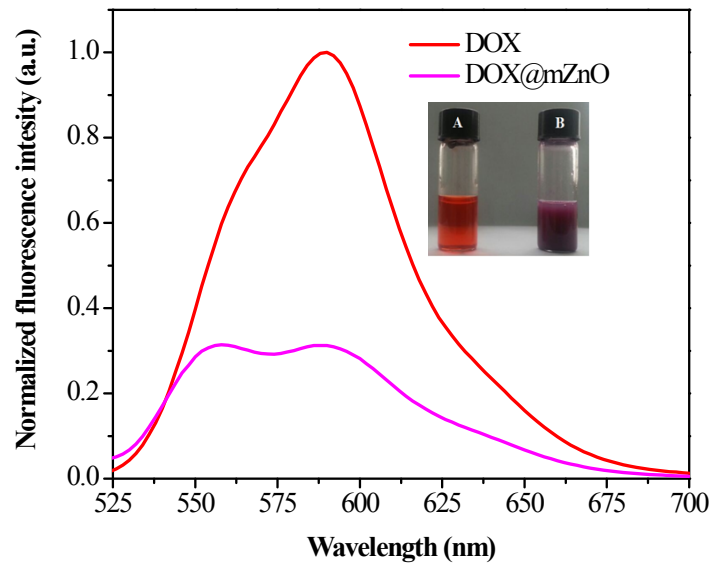

**Fig. S2** Normalized fluorescence spectra of DOX and DOX@mZnO (the concentration of DOX was 200  $\mu\text{g}/\text{mL}$  and excitation wavelength was 480 nm). Inset: Photograph of DOX and DOX@mZnO in water under unlight.

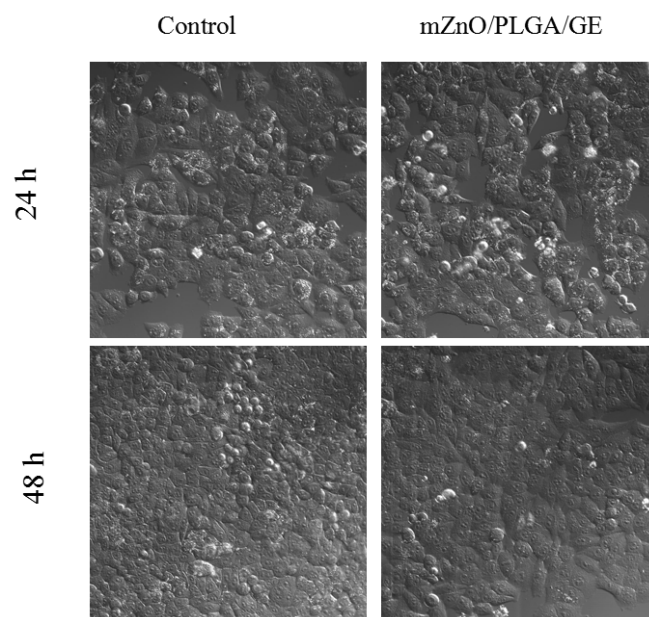

**Fig. S3** CLSM bright field images of HepG-2 cells treated with blank media and ZnO/PLGA/GE composite nanofibers for 24 h and 48 h.

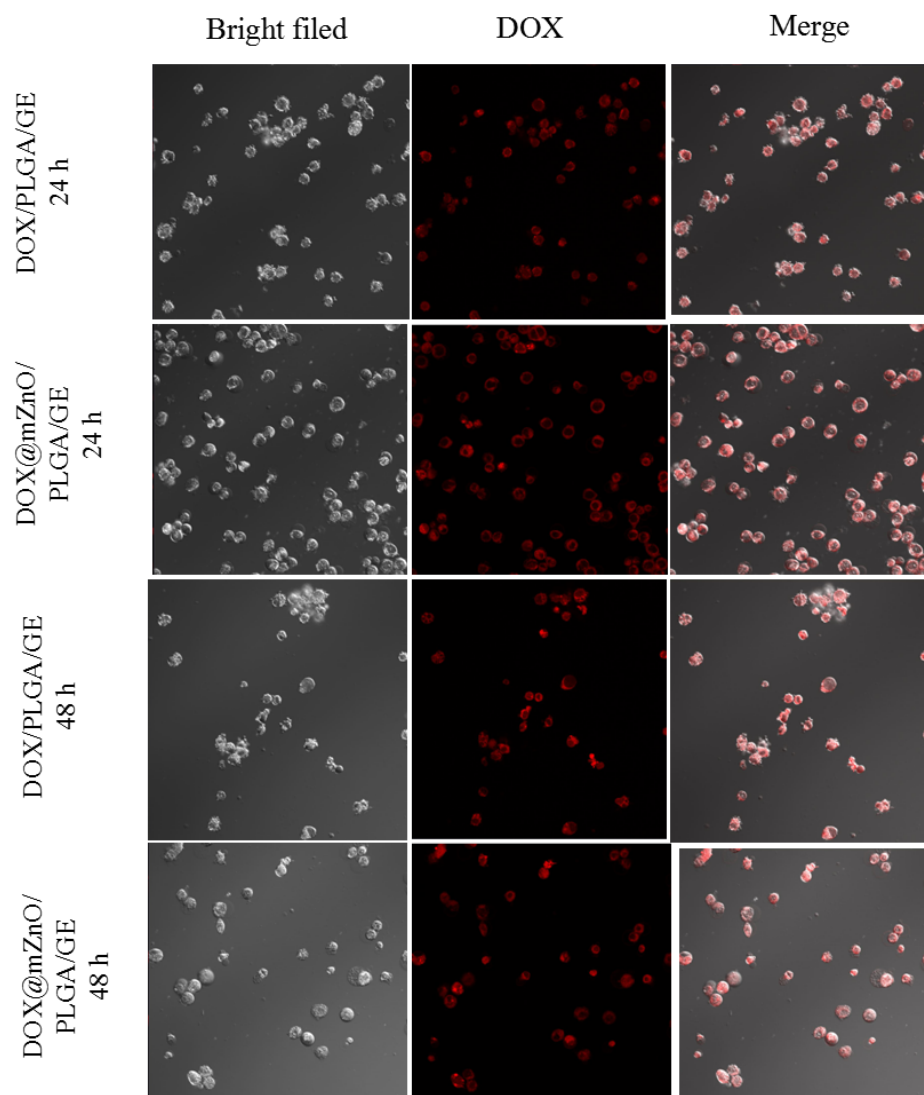

**Fig. S4** CLSM images of HepG-2 cells treated with DOX/PLGA/GE and DOX@mZnO/PLGA/GE composite nanofibers for 24 h and 48 h. DOX concentration was 25  $\mu\text{g}/\text{mL}$ . Red fluorescence represented the released DOX.
